# Supplementary material for: Multi-metal oxide incorporated microcapsules for efficient As(iii) and As(v) removal from water
Source: Royal Society of Chemistry journal article supplement (doi:10.1039/c4ra09030f), 2014-10-09
Supplement: c4ra09030f1.pdf [file c4ra09030f1.pdf]

## Multi-metal Oxides Incorporated Microcapsules for Efficient As(III) and As(V) Removal from Water

Daisy Setyono, Suresh Valiyaveetil\*

Department of Chemistry, National University of Singapore, Singapore 117543

E-mail: [chmsv@nus.edu.sg](mailto:chmsv@nus.edu.sg)

### Supporting Information

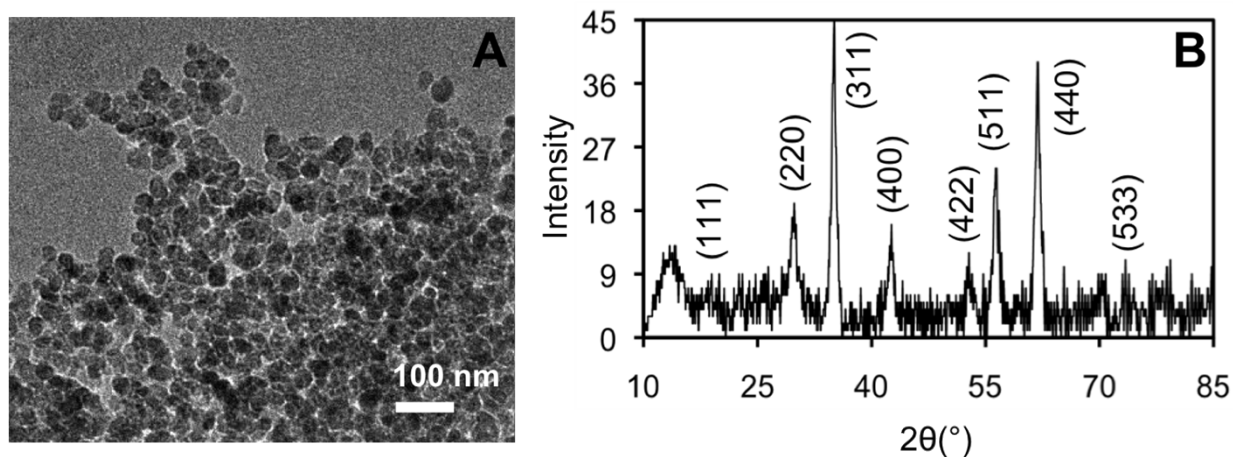

Fig. S1. TEM image (A) and XRD pattern (B) of  $\text{Fe}_3\text{O}_4$  nanoparticles synthesized in triethyleneglycol.

Table S1. Three cycles of As(III) and As(V) adsorption and desorption using MC-2.

|         | % Desorption | % Adsorption    |                 |                 |
|---------|--------------|-----------------|-----------------|-----------------|
|         |              | 1 <sup>st</sup> | 2 <sup>nd</sup> | 3 <sup>rd</sup> |
| As(III) | 94           | >95             | 86              | 74              |
| As(V)   | 82           | >95             | 90              | 64              |
